# Supplementary material
Source: HighWire-hosted journal article supplement (http://ajnr-stage2.highwire.org/highwire/filestream/60538/field_highwire_adjunct_files/0/17-01003.pdf)
Supplement: 17-01003.pdf [file 17-01003.pdf]

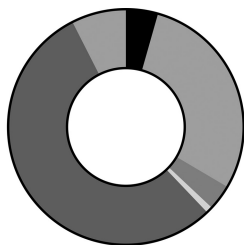

- Residency or fellowship trained (4.41%)
- Neurointerventional radiologist (29.07%)
- General radiologist with an interest in neuroradiology (3.52%)
- Endovascular neurosurgeon (0.88%)
- Diagnostic neuroradiologist (practice >50% neuroradiology) (54.63%)
- Diagnostic neuroradiologist (practice <50% neuroradiology) (7.49%)

**ON-LINE FIG 1.** Survey result of respondents' practice statuses.

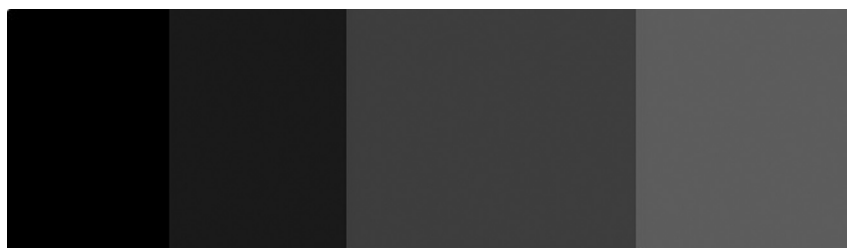

- 0-25% (19%, 41)
- 26-50% (21%, 45)
- 51-75% (34%, 74)
- 76-100% (26%, 57)

**ON-LINE FIG 2.** Survey result of the frequency of all UIAs.

**On-line Table: Survey questions**

| Question No. | Question                                                                                                                                             | Options                                                                                                                                                                                                                                                                                                                                                                                                                |
|--------------|------------------------------------------------------------------------------------------------------------------------------------------------------|------------------------------------------------------------------------------------------------------------------------------------------------------------------------------------------------------------------------------------------------------------------------------------------------------------------------------------------------------------------------------------------------------------------------|
| 1)           | What is your current practice status?                                                                                                                | Residency or fellowship training<br>Diagnostic neuroradiologist (practice more than 50% neuroradiology)<br>Diagnostic neuroradiologist (practice less than 50% neuroradiology)<br>Neurointerventional radiologist<br>Endovascular neurosurgeon<br>General radiologist with an interest in neuroradiology                                                                                                               |
| 2)           | Your practice setting is                                                                                                                             | Academic, tertiary care center<br>Private practice<br>Hybrid (combined practice in academic and community setting)<br>Community<br>Other                                                                                                                                                                                                                                                                               |
| 3)           | Regarding UIAs (choose all that apply)                                                                                                               | Rupture rate is uniform irrespective of size<br>Growing aneurysms are at much higher risk of rupture for aneurysms of all sizes<br>Aneurysms usually rupture many years after they form (>10 years)<br>Treatment (clipping or coiling) completely eliminates any chance of subsequent subarachnoid hemorrhage<br>The frequency and duration of imaging follow-up should be similar in unruptured and treated aneurysms |
| 4)           | Based on your professional experience, the frequency of small (<7 mm) unruptured intracranial aneurysms among all aneurysms is                       | 0%–25%<br>26%–50%<br>51%–75%<br>76%–100%                                                                                                                                                                                                                                                                                                                                                                               |
| 5)           | Regarding the management and treatment of small (<7 mm) unruptured intracranial aneurysms (choose all that apply)                                    | Routine treatment (clipping or coiling) should be considered<br>Routine periodic imaging surveillance would be appropriate<br>No imaging follow-up is needed<br>Only high-risk patients need treatment or imaging follow-up (such as growing aneurysms)                                                                                                                                                                |
| 6)           | The frequency of follow-up imaging for small (<7 mm) untreated aneurysms should be                                                                   | Every 6 months<br>Every 6 months for the first year, followed by annual imaging<br>Annual<br>Biennial<br>Every 5 years                                                                                                                                                                                                                                                                                                 |
| 7)           | The duration of follow-up imaging for untreated small (<7 mm) stable aneurysms should be                                                             | 2 years<br>5 years<br>10 years<br>Indefinite life-long follow-up                                                                                                                                                                                                                                                                                                                                                       |
| 8)           | The best imaging modality to follow up small (<7 mm) UIAs would be                                                                                   | CT angiography<br>MR angiography without contrast time-of-flight<br>MR angiography with contrast<br>Digital subtraction angiography (conventional angiography)<br>Any of the above imaging would be equally appropriate                                                                                                                                                                                                |
| 9)           | In your practice, which of the following measurements is used to assess the growth of small UIAs (choose all that apply)?                            | The largest dimension in any plane<br>Aneurysm height<br>Dome-to-neck ratio<br>Aspect ratio (aneurysm height divided by aneurysm neck)<br>Aneurysm-to-parent vessel size ratio                                                                                                                                                                                                                                         |
| 10)          | In your practice, which of the following criteria are used to define growth for small UIAs (choose all that apply)?                                  | Increase of >0.5 mm in 1 dimension<br>Growth >1.5 times the aneurysm size<br>Growth >1 mm in at least 1 direction<br>Change in size to the nearest 10th of a millimeter more than the measurement error per manufacturer specifications<br>Increase in volume of >5%                                                                                                                                                   |
| 11)          | In your practice, the following patients would be considered high risk for intracranial aneurysms and are routinely screened (choose all that apply) | A family member with history of unruptured aneurysm<br>Patient with ascending aortic aneurysm<br>Patient with adult polycystic kidney disease<br>History of subarachnoid hemorrhage                                                                                                                                                                                                                                    |
| 12)          | In your practice, which of the following characteristics are used to determine treatment decisions (choose all that apply)?                          | Change in size<br>Complex morphology<br>Change in morphology<br>Patient preference<br>Age<br>Sex<br>Smoking history                                                                                                                                                                                                                                                                                                    |
